# Supplementary material for: A Facile Method for the Preparation of Colored Bi4Ti3O12−x Nanosheets with Enhanced Visible-Light Photocatalytic Hydrogen Evolution Activity
Source: PubMed Central journal article supplement (PMC5923591; doi:10.3390/nano8040261), 2018-04-21
Supplement: nanomaterials-08-00261-s001.pdf [file nanomaterials-08-00261-s001.pdf]

## Supplementary Materials

# A Facile Method for the Preparation of Colored $\text{Bi}_4\text{Ti}_3\text{O}_{12-x}$ Nanosheets with Enhanced Visible Light Photocatalytic Hydrogen Evolution Activity

Yizeng Zhang <sup>1</sup>, Zhiwu Chen <sup>1,2,\*</sup>, and Zhenya Lu <sup>1</sup>

### Synthesis of $\text{Bi}_4\text{Ti}_3\text{O}_{12}$ Nanosheets

$\text{Bi}_4\text{Ti}_3\text{O}_{12}$  nanosheets were prepared via sol-gel synthesis and subsequent hydrothermal processing. First, according to the composition of  $\text{Bi}_4\text{Ti}_3\text{O}_{12}$ , solutions A and B were obtained by dissolving 0.02 mol  $\text{Bi}(\text{NO}_3)_3 \cdot 5\text{H}_2\text{O}$  in 15 ml acetic acid and 0.15 mol  $\text{Ti}(\text{C}_4\text{H}_9\text{O})_4$  in 15 ml ethylene glycol monomethylether under stirring at room temperature, respectively. All reagents were of analytical grade. Solution B was slowly added into solution A dropwise, and the mixture was vigorously stirred for 2 h, resulting in a homogeneous sol. The sol was stabilized when its concentration was adjusted to 0.1 M by adding 10 ml acetic acid and 10 ml ethylene glycol monomethylether, before being heated to 80 °C for 24 h to produce dry gel. The gel was added to 75 ml of a 3 M NaOH solution to form a suspension, poured into a Teflon-lined, stainless-steel autoclave (volume of 100 ml) with a filling capacity of 80%, and subjected to hydrothermal treatment at 160 °C for 16 h unless otherwise stated. Finally, the synthesized product was cooled down, filtered, washed with distilled water, and dried at room temperature.

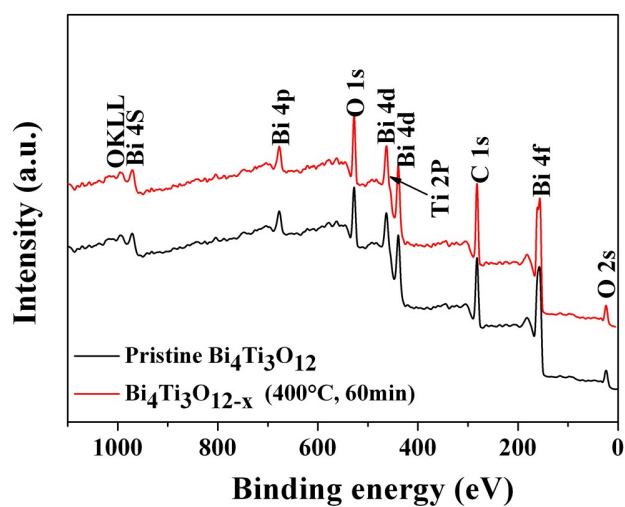

Figure S1. XPS survey spectra for (a) pristine  $\text{Bi}_4\text{Ti}_3\text{O}_{12}$  and (b)  $\text{Bi}_4\text{Ti}_3\text{O}_{12-x}$  (350 °C, 60 min).

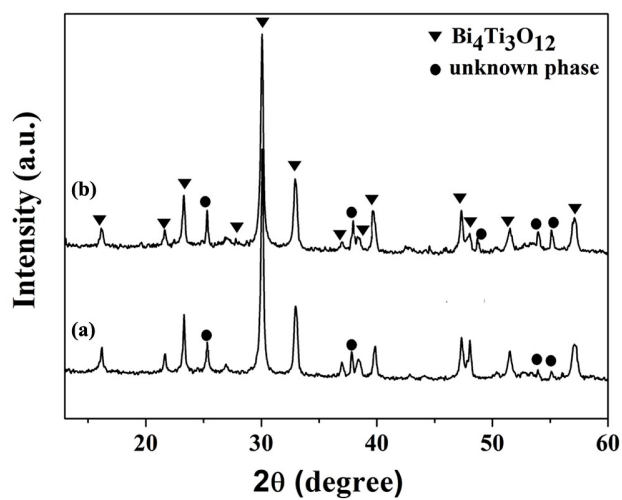

Figure S2. X-ray diffraction patterns of (a)  $\text{Bi}_4\text{Ti}_3\text{O}_{12-x}$  (350 °C, 120 min) and (b)  $\text{Bi}_4\text{Ti}_3\text{O}_{12-x}$  (400 °C, 80 min).
